# Supplementary figures and images for: Disease-associated mutations in the human TRPM3 render the channel overactive via two distinct mechanisms
Source: eLife journal article supplement (doi:10.7554/elife.55634), 2020-04-28

A

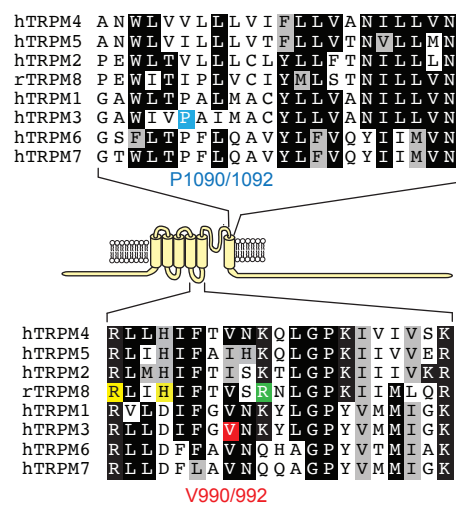

B

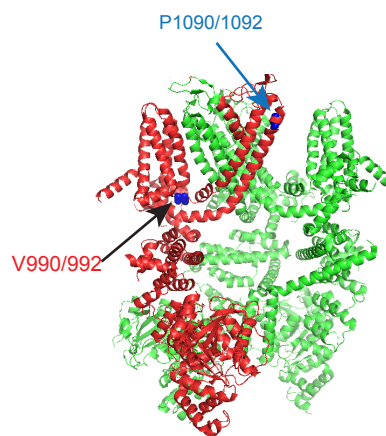

Figure 1 Figure Supplement 1

Supplement: supp [file elife-55634-supp-v1.zip]

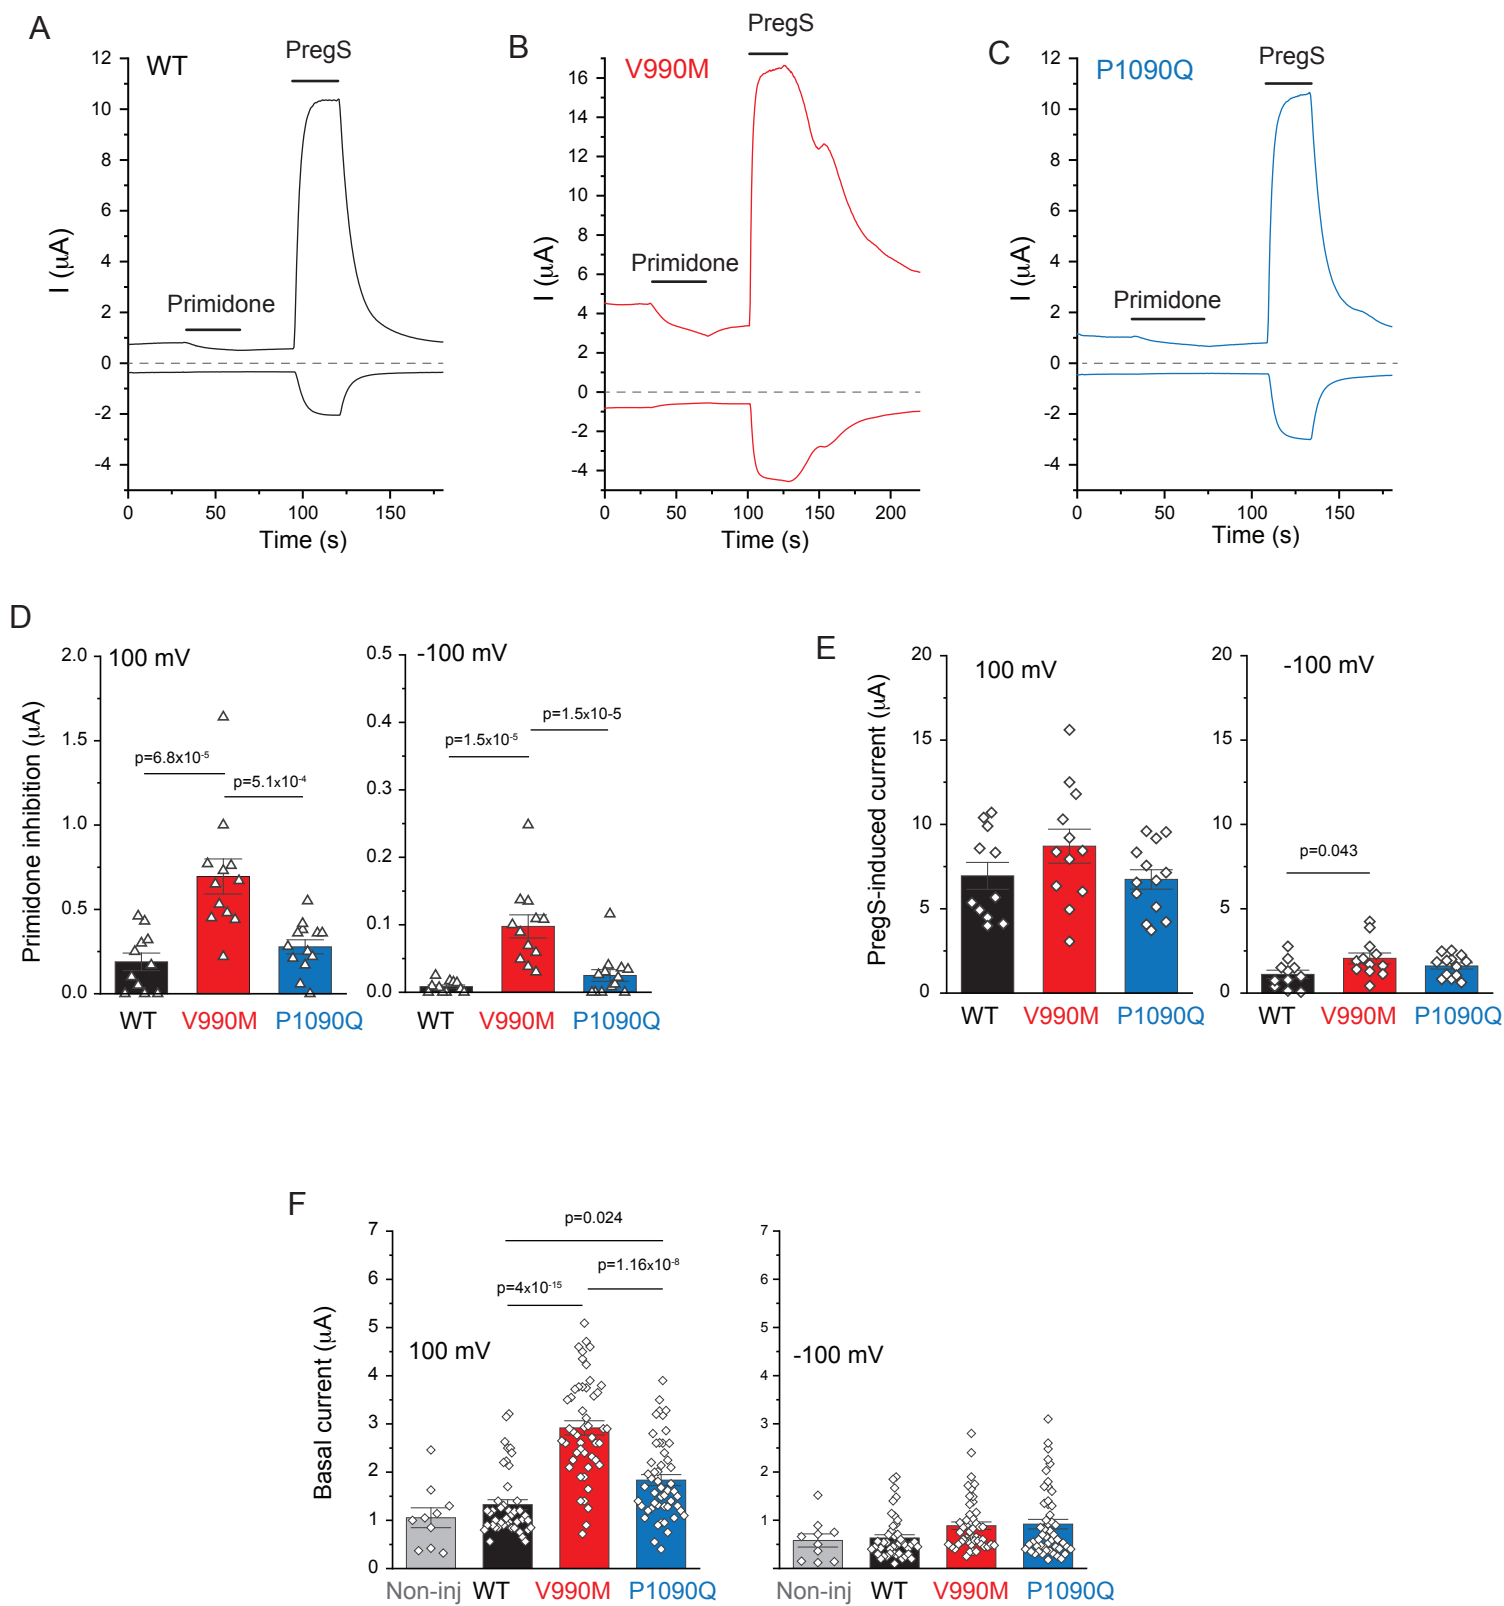

Figure 4 Figure Supplement 1

Supplement: supp [file elife-55634-supp-v1.zip]

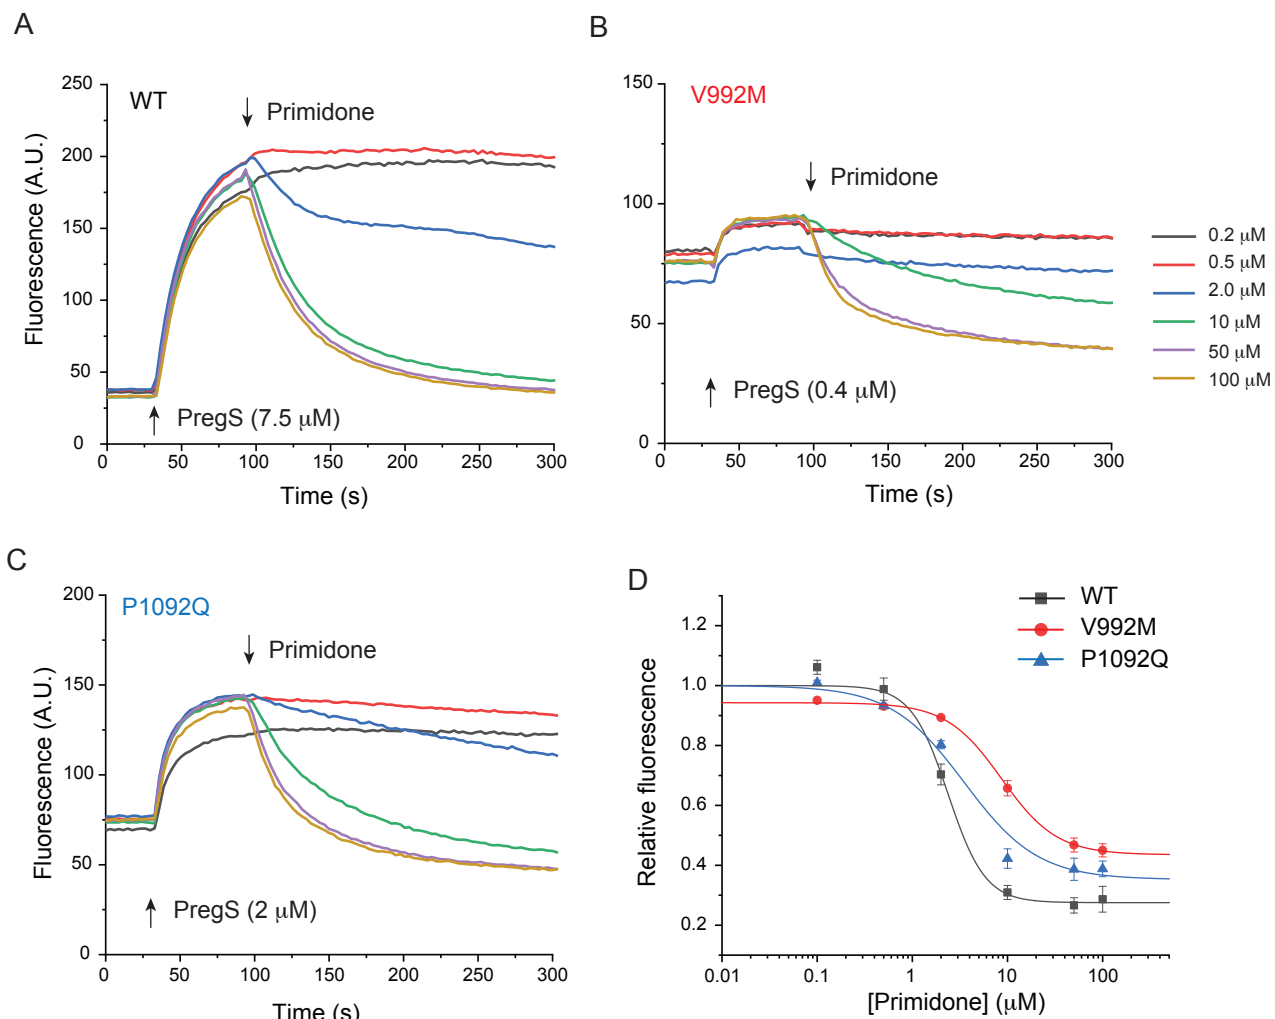

Figure 1 Figure Supplement 2

Supplement: supp [file elife-55634-supp-v1.zip]

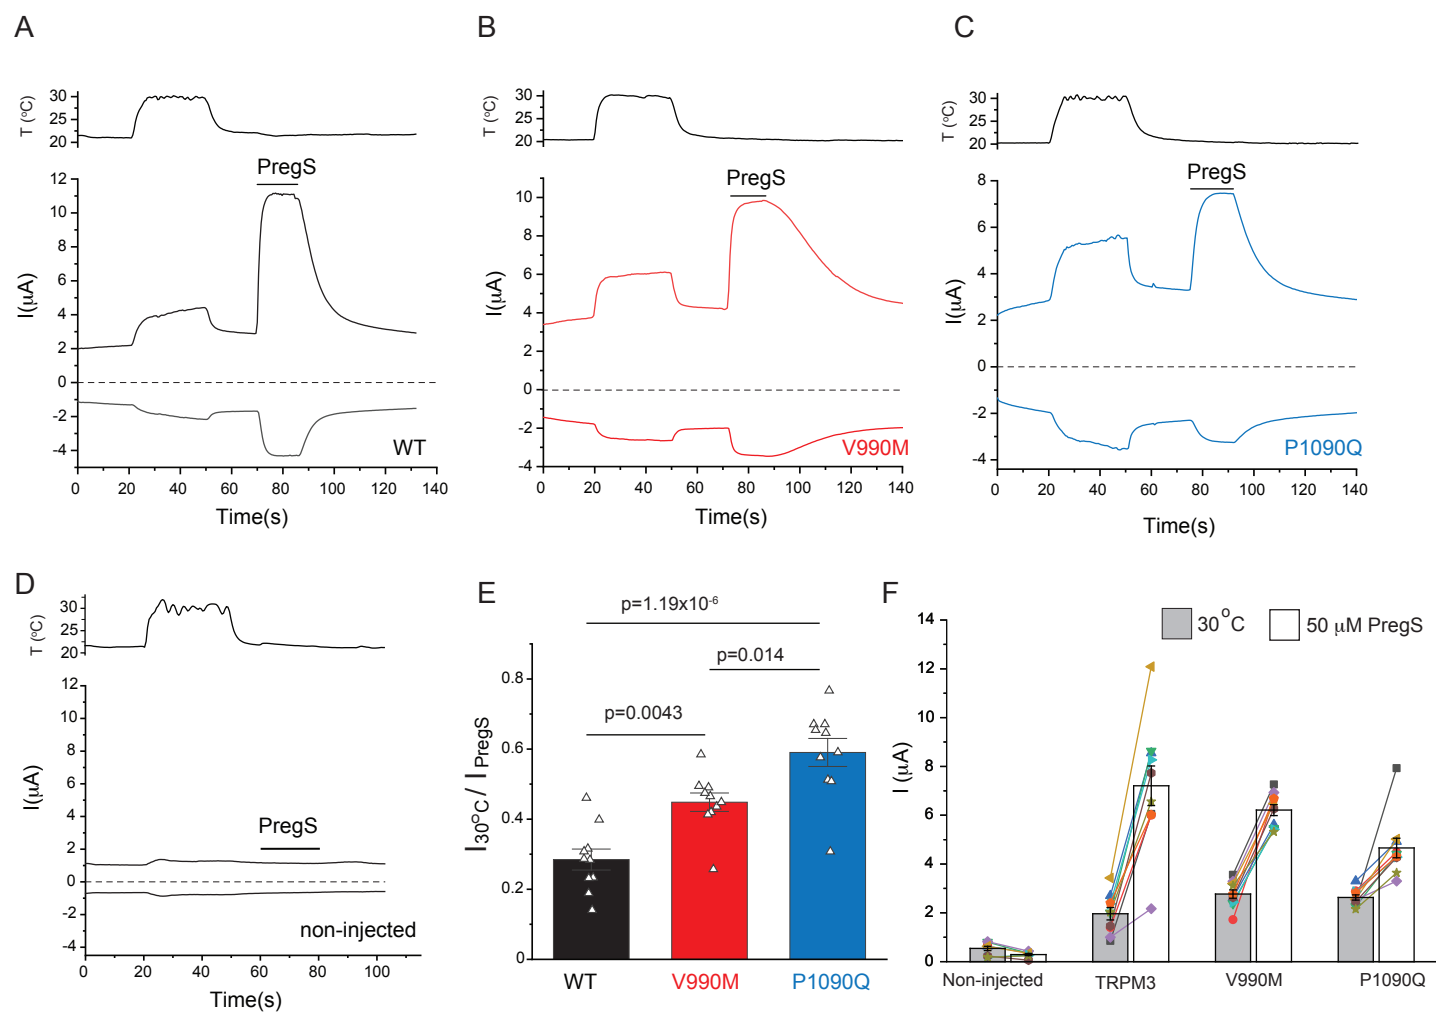

Figure 4 Figure Supplement 2

Supplement: supp [file elife-55634-supp-v1.zip]

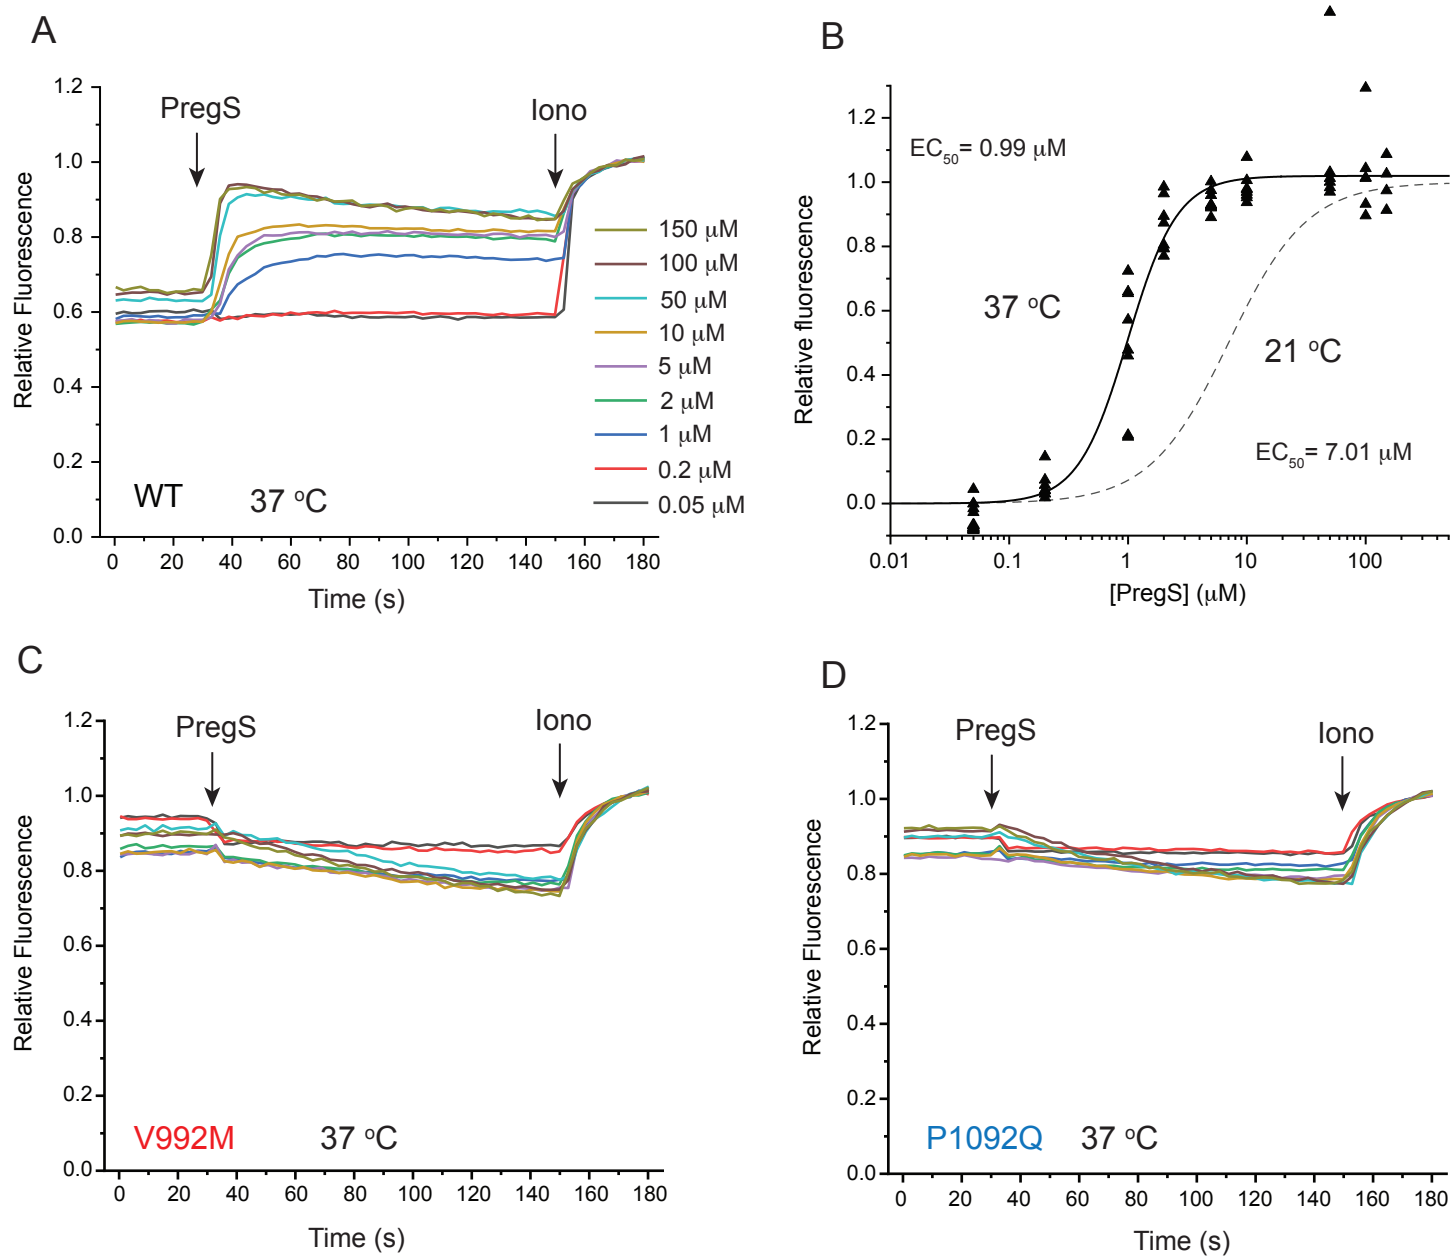

Figure 1 Figure Supplement 3

Supplement: supp [file elife-55634-supp-v1.zip]

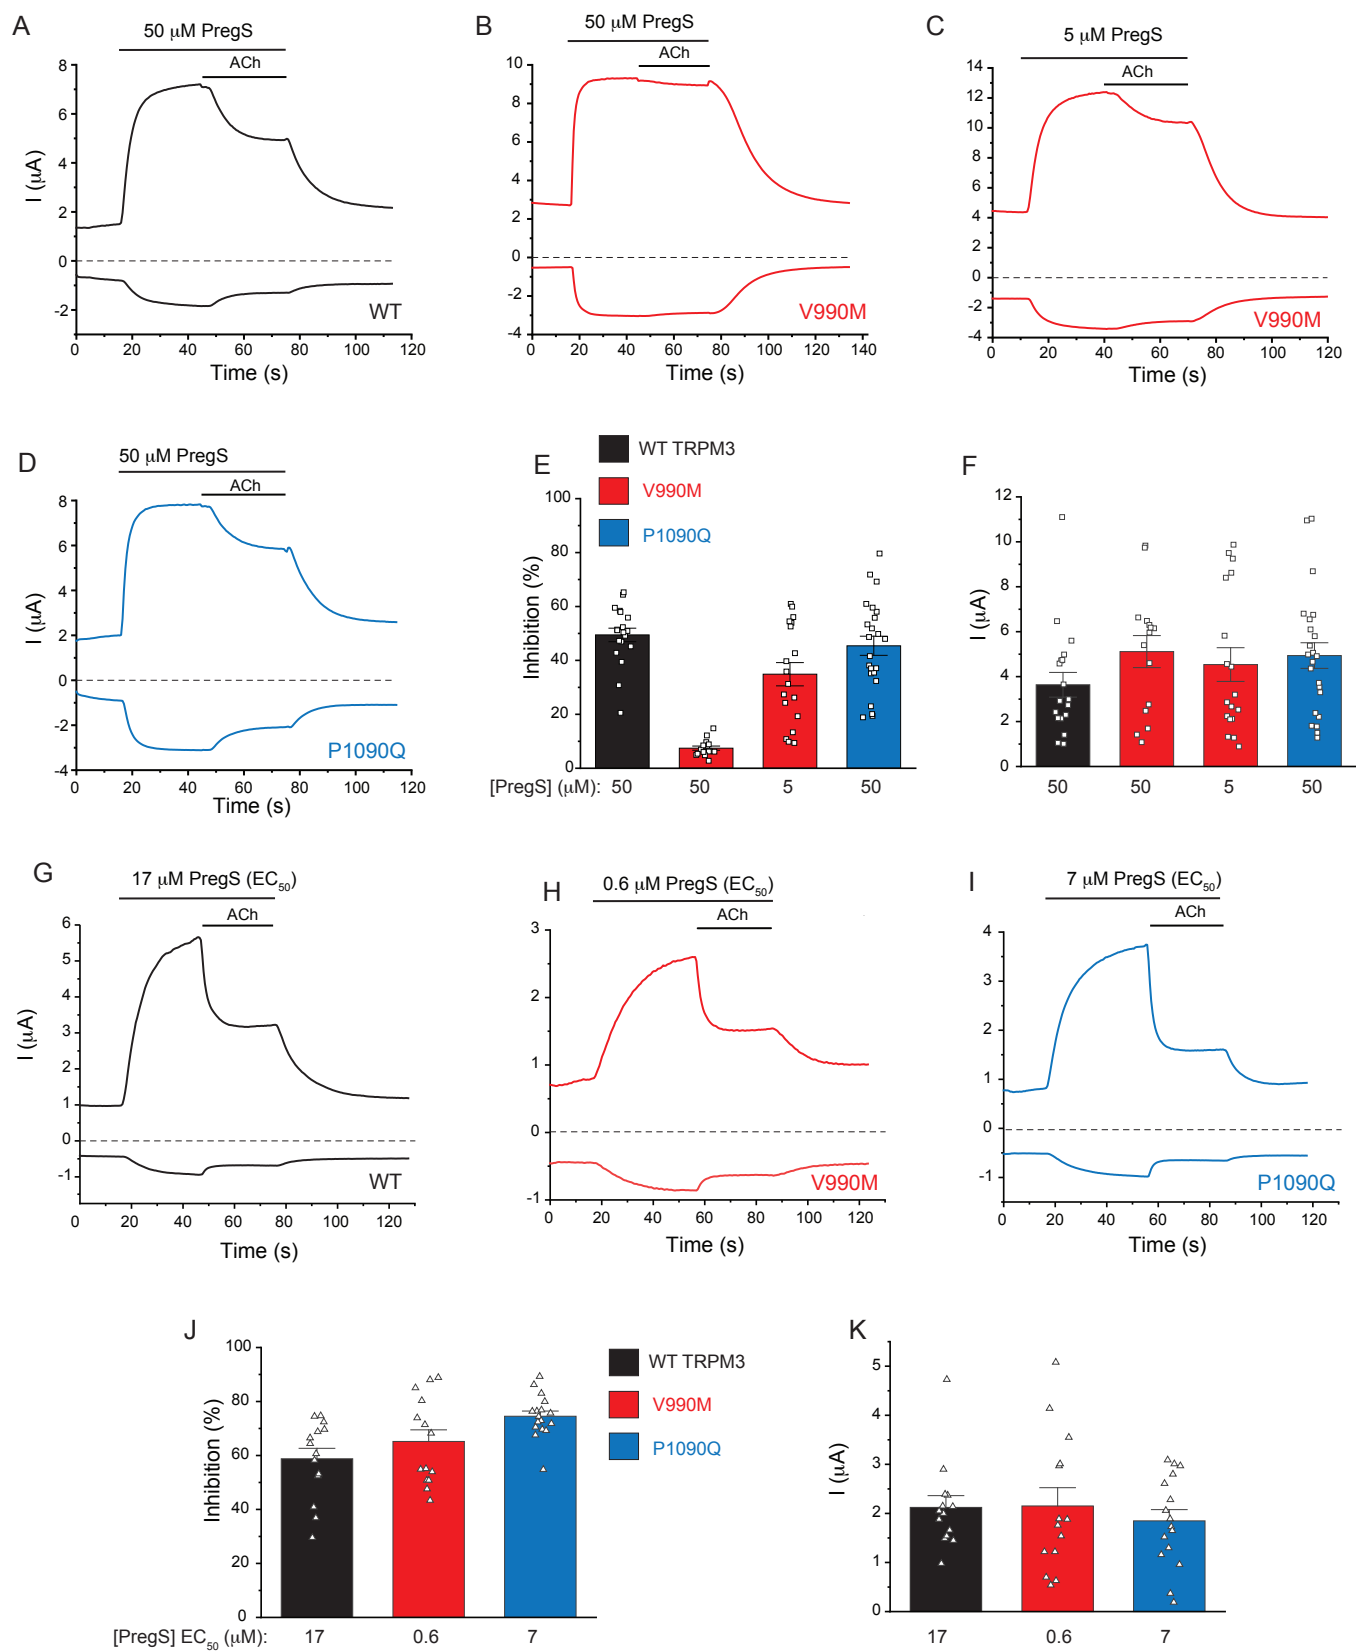

Figure 4 Figure Supplement 3

Supplement: supp [file elife-55634-supp-v1.zip]
